# Supplementary material
Source: MDPI journal article supplement (https://www.mdpi.com/2571-5135/9/2/14)
Supplement: s1 [file s1]

# Supplementary Materials: Intralaboratory Evaluation of Luminescence Based High-Throughput Serum Bactericidal Assay (L-SBA) to Determine Bactericidal Activity of Human Sera against *Shigella*

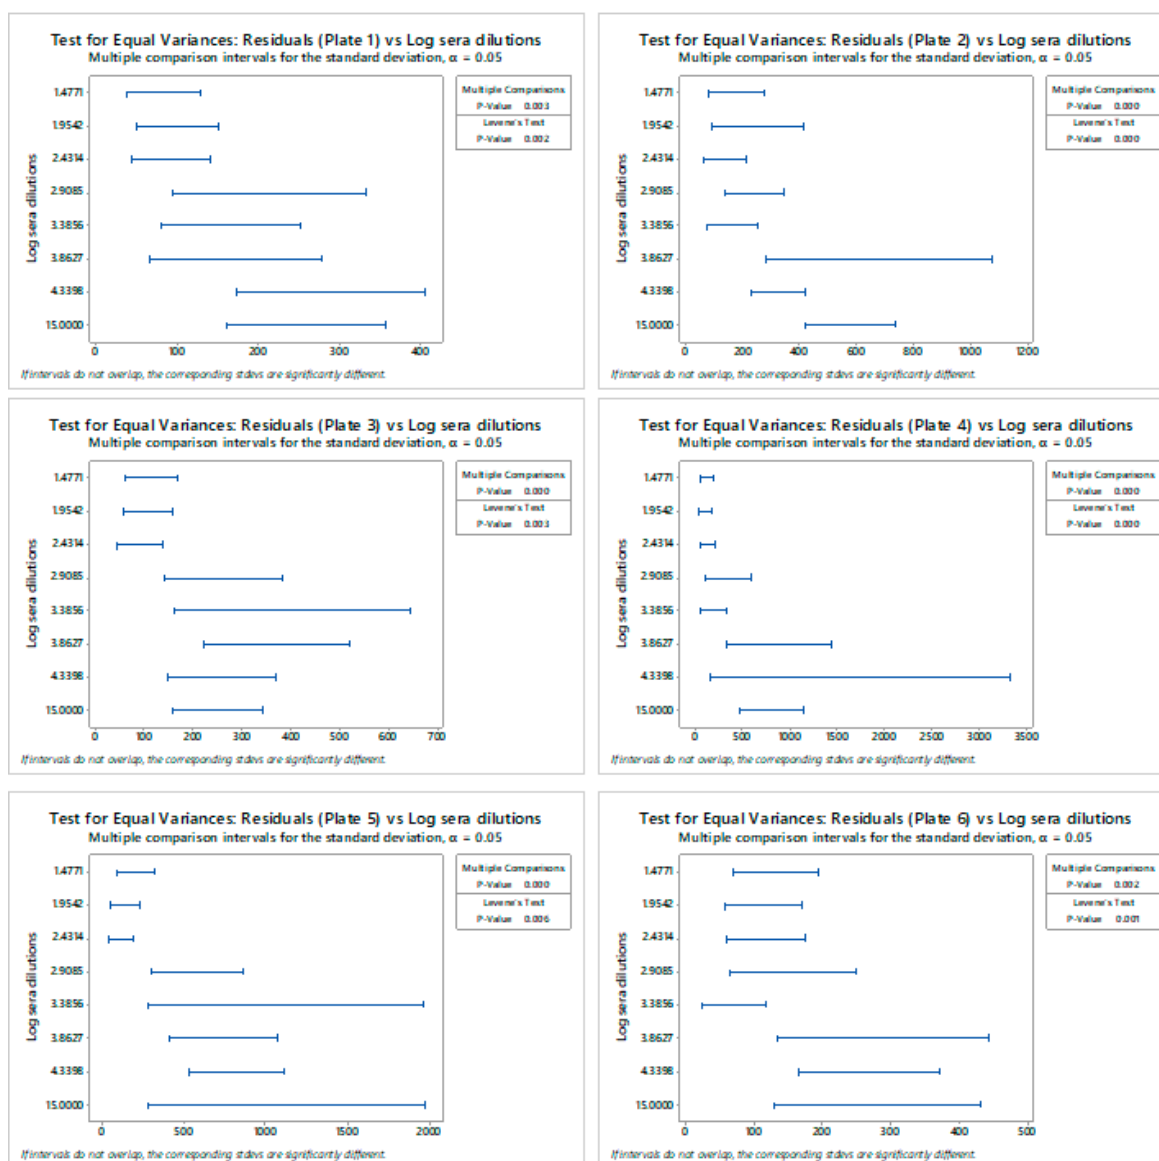

**Figure S1:** Test for equal variances for homoscedasticity. Variances (x axis) from 12 replicates versus Log sera dilutions (y axis) were plotted for each of 6 different plates tested.

## General Linear Model: LogIC50 versus Day; Operator

### Method

Factor coding (-1; 0; +1)

### Analysis of Variance

| Source      | DF | Adj SS  | Adj MS  | F-Value | P-Value |
|-------------|----|---------|---------|---------|---------|
| Day         | 2  | 0.04307 | 0.02154 | 0.51    | 0.605   |
| Operator    | 1  | 0.01025 | 0.01025 | 0.24    | 0.625   |
| Error       | 68 | 2.89545 | 0.04258 |         |         |
| Lack-of-Fit | 2  | 0.52420 | 0.26210 | 7.30    | 0.001   |
| Pure Error  | 66 | 2.37125 | 0.03593 |         |         |
| Total       | 71 | 2.94877 |         |         |         |

### Variance Components, using Adjusted SS

| Source   | Variance      | % of Total | StDev    | % of Total |
|----------|---------------|------------|----------|------------|
| Day      | -0.000876847* | 0.00%      | 0.000000 | 0.00%      |
| Operator | -0.000898176* | 0.00%      | 0.000000 | 0.00%      |
| Error    | 0.0425802     | 100.00%    | 0.206350 | 100.00%    |
| Total    | 0.0425802     |            | 0.206350 |            |

\* Value is negative, and is estimated by zero.

**Figure S2:** ANOVA with variance component analysis obtained from the 72 individual LogIC50 produced by two operators in 3 different days, each day assaying independently twelve times the same sera.

## A) Regression Analysis: log ic50 versus log ic50theo

### Analysis of Variance

| Source       | DF | Seq SS  | Contribution | Adj SS | Adj MS  | F-Value | P-Value |
|--------------|----|---------|--------------|--------|---------|---------|---------|
| Regression   | 1  | 8.0709  | 77.02%       | 8.0709 | 8.07088 | 73.73   | 0.000   |
| log ic50theo | 1  | 8.0709  | 77.02%       | 8.0709 | 8.07088 | 73.73   | 0.000   |
| Error        | 22 | 2.4084  | 22.98%       | 2.4084 | 0.10947 |         |         |
| Lack-of-Fit  | 5  | 0.9071  | 8.66%        | 0.9071 | 0.18143 | 2.05    | 0.122   |
| Pure Error   | 17 | 1.5013  | 14.33%       | 1.5013 | 0.08831 |         |         |
| Total        | 23 | 10.4793 | 100.00%      |        |         |         |         |

### Model Summary

| S        | R-sq   | R-sq(adj) | PRESS   | R-sq(pred) |
|----------|--------|-----------|---------|------------|
| 0.330866 | 77.02% | 75.97%    | 2.87532 | 72.56%     |

### Coefficients

| Term         | Coef   | SE Coef | 95% CI          | T-Value | P-Value | VIF  |
|--------------|--------|---------|-----------------|---------|---------|------|
| Constant     | -0.658 | 0.364   | (-1.412; 0.096) | -1.81   | 0.084   |      |
| log ic50theo | 1.128  | 0.131   | (0.856; 1.400)  | 8.59    | 0.000   | 1.00 |

## B)

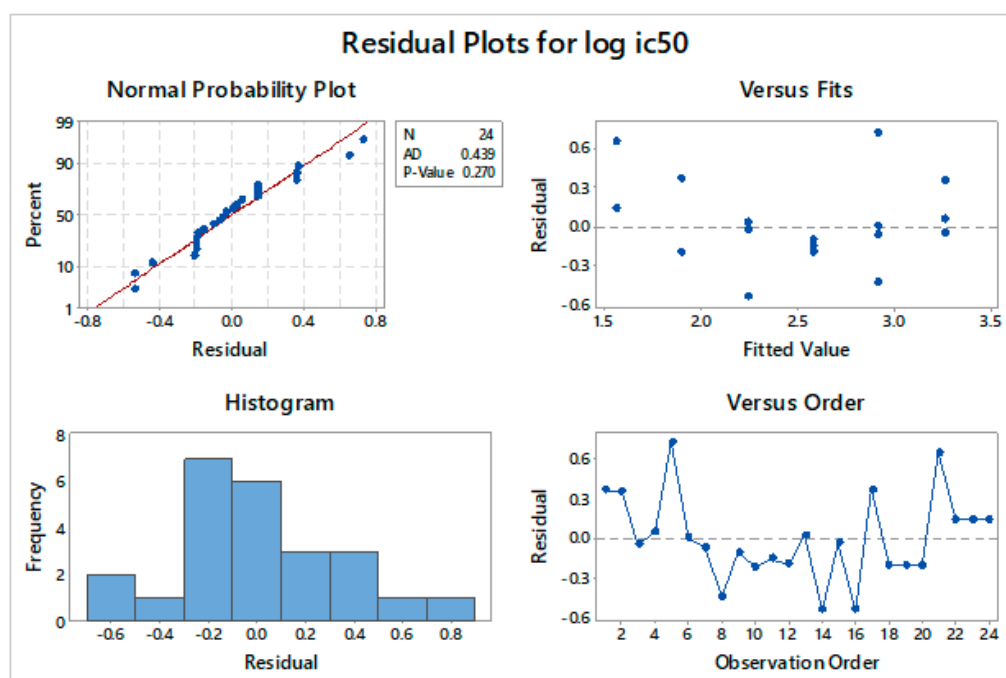

**Figure S3:** (A) Regression analysis for linearity assessment. (B) Residual plots for LogIC50.

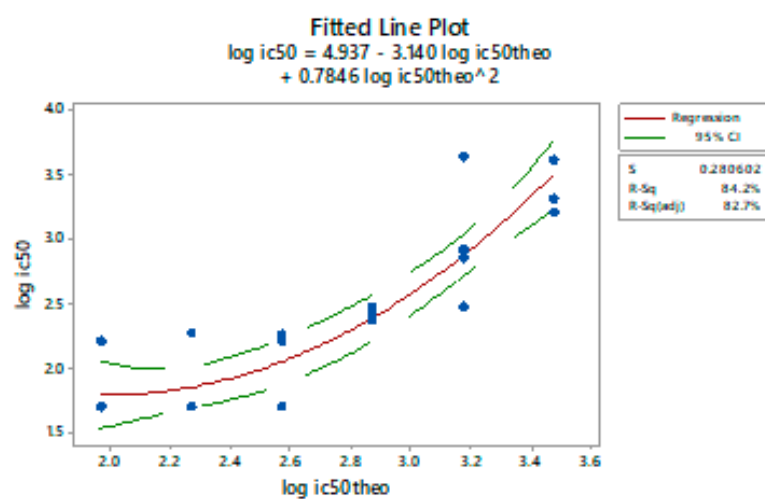

**Figure S4:** Linearity. Log(IC50 theoretical) obtained for each sample versus Log(IC50 observed) are reported. Single datapoints are indicated with blue dots. Red solid line represents second order exponential regression and green dashed line the 95% confidence interval (CI).
